# Supplementary material for: Automating Accountability: Smart Contracts and the Legal Future of Digital Product Passports in the EU Circular Economy
Source: Research Square preprint supplement (doi:10.21203/rs.3.rs-8397708/v1), 2026-01-16
Supplement: Supplementary file 1 [file a5339981a14f850a8e1074c3.docx]

**Supplementary Data 1: Data and Materials Package**

Manuscript title: Automating Accountability: Smart Contracts and the Legal Future of Digital Product Passports in the EU Circular Economy

Purpose: This file provides the supporting documentation needed for editors and referees to verify and scrutinise the legal-doctrinal methods and the sources underpinning the analysis.

**1. Study design and scope**

Design: Legal-doctrinal and comparative analysis of the EU regulatory framework governing Digital Product Passports (DPPs) and smart contracts, with a focus on accountability and contestability requirements. Unit of analysis: binding EU legal acts (regulations/directives), official guidance (EDPB), and EU case law (CJEU). No human participants or proprietary datasets were used.

**2. Primary sources and stable direct links**

Table S1 lists the core primary sources used in the manuscript and provides stable direct URLs.

| Source type | Instrument / document | Identifier | Stable direct URL |
| --- | --- | --- | --- |
| Regulation (EU) | Ecodesign for Sustainable Products Regulation (ESPR) | 2024/1781 | https://eur-lex.europa.eu/eli/reg/2024/1781/oj/eng |
| Regulation (EU) | Data Act | 2023/2854 | https://eur-lex.europa.eu/legal-content/EN/TXT/PDF/?uri=OJ%3AL_202302854 |
| Regulation (EU) | General Data Protection Regulation (GDPR) | 2016/679 | https://eur-lex.europa.eu/legal-content/EN/TXT/PDF/?uri=CELEX:32016R0679 |
| Regulation (EU) | Batteries and Waste Batteries Regulation | 2023/1542 | https://eur-lex.europa.eu/legal-content/EN/TXT/PDF/?uri=CELEX%3A32023R1542 |
| Directive (EU) | Product Liability Directive (recast) | 2024/2853 | https://eur-lex.europa.eu/legal-content/EN/TXT/PDF/?uri=CELEX%3A32024L2853 |
| Regulation (EU) | Cyber Resilience Act | 2024/2847 | https://eur-lex.europa.eu/legal-content/EN/TXT/PDF/?uri=CELEX%3A32024R2847 |
| Regulation (EU) | Artificial Intelligence Act | 2024/1689 | https://eur-lex.europa.eu/legal-content/EN/TXT/PDF/?from=EN&uri=CELEX%3A32024R1689 |
| EDPB Guidelines | Guidelines 02/2025 on processing of personal data through blockchain technologies (draft) | 02/2025 | https://www.edpb.europa.eu/system/files/2025-04/edpb_guidelines_202502_blockchain_en.pdf |
| CJEU Judgment | SCHUFA Holding (automated decision-making; GDPR Art. 22) | C‑634/21 (ECLI:EU:C:2023:957) | https://curia.europa.eu/juris/document/document.jsf?docid=280426&doclang=EN |

**3. Coding scheme (operational definitions)**

Table S2 summarises the coding scheme applied when extracting legal requirements from primary sources into the manuscript’s accountability framework.

| Construct (code) | Operational definition used in this study | Examples of indicators in legal text |
| --- | --- | --- |
| Explainability (EXPL) | Requirements that enable an affected person or supervisor to understand how an automated outcome was produced. | Reasons/logic disclosure; intelligible information; documentation duties. |
| Contestability (CONT) | Requirements enabling challenge, review, appeal, or meaningful human intervention in automated outcomes. | Right to obtain human intervention; complaint/appeal; review procedures. |
| Termination & Control (TERM) | Requirements ensuring smart contracts can be stopped/overridden safely and access can be revoked. | Kill switch; termination clause; access control; emergency shutdown. |
| Auditability & Record-Keeping (AUD) | Requirements that support traceability, logging, and verification by competent authorities or third parties. | Logging, archiving, retention; audit trails; supervisory access. |
| Liability Allocation (LIAB) | Rules assigning responsibility and remedies for harm from defective products/software or unlawful processing/automation. | Defectiveness; causation presumptions; controller/processor roles; damages. |
| Conformity Assessment / Certification (CERT) | Requirements for assessment against standards and/or third-party certification obligations. | CE marking; conformity modules; cybersecurity certification. |
| Governance & Oversight (GOV) | Institutional governance mechanisms for supervision, enforcement, and accountability in DPP ecosystems. | Market surveillance; competent authorities; enforcement powers; penalties. |

**4. Provision-to-framework mapping matrix**

Table S3 provides a compact mapping of the key provisions cited in the manuscript to the framework layers. This mapping supports verification of how primary legal requirements were translated into the article’s analytical categories.

| Primary source | Provision(s) emphasised | Main coded constructs | How used in the manuscript |
| --- | --- | --- | --- |
| Data Act (EU) 2023/2854 | Art. 36 (smart contracts for data sharing) | TERM; AUD; GOV | Baseline requirements for robustness, termination, access control, and archiving; identified gaps on explainability/contestability. |
| GDPR (EU) 2016/679 | Art. 22; Arts. 12–15; Arts. 16–18; Art. 25; Art. 28; Art. 32; Art. 35 | EXPL; CONT; LIAB; GOV | Constraints on automated decisions; transparency; rights; DPIA and accountability obligations. |
| CJEU C‑634/21 SCHUFA | Judgment (7 Dec 2023) interpreting Art. 22 | CONT; EXPL | Clarifies when automated outputs constitute ‘decisions’ producing legal/similar significant effects. |
| EDPB Guidelines 02/2025 | Blockchain roles; data subject rights; off-chain/on-chain design guidance | LIAB; GOV; AUD; EXPL | Interpretive guidance for GDPR compliance in blockchain-based DPP designs. |
| ESPR (EU) 2024/1781 | Framework for DPP; delegated acts | AUD; GOV; CERT | Defines the DPP system context and governance; highlights delegated acts as key implementation layer. |
| Batteries Reg (EU) 2023/1542 | Battery passport obligations | AUD; CERT; GOV | Sectoral DPP example; used to ground practical compliance and phased deployment. |
| Cyber Resilience Act (EU) 2024/2847 | Security requirements for products with digital elements | CERT; AUD; GOV | Illustrates cybersecurity baseline expectations and potential conformity mechanisms. |
| Product Liability Dir (EU) 2024/2853 | Liability for defective products incl. software | LIAB | Supports discussion of liability allocation across operators and software components. |

**5. Notes on statistical code and scripts**

Not applicable. The study does not use statistical modelling or computational analysis of datasets. The ‘data’ underpinning the study consist of the primary legal materials above and the structured coding/mapping contained in this file.
